# Supplementary material for: Evaluation of the Diagnostic Capability of Spectralis SD-OCT 8 × 8 Posterior Pole Software with the Grid Tilted at 7 Degrees and Horizontalized in Glaucoma
Source: MDPI journal article supplement (doi:10.3390/jcm13041016), 2024-02-09
Supplement: s1 [file s1]

## Supplementary

**Table S1.** Area Under the Curve (AUROC) value, 95% Confidence Interval (CI) and p-value for each cell of the 8x8 macular grid of the macular Retinal Nerve Fiber Layer (RNFL) with the grid tilted at 7° and with the grid horizontalized.

|           | INCLINED 7° |               |         | HORIZONTAL |               |         |
|-----------|-------------|---------------|---------|------------|---------------|---------|
|           | AUROC       | CI 95%        | p-value | AUROC      | CI 95%        | p-value |
| RNFL _1.1 | 0.711       | 0.652 - 0.769 | < 0.001 | 0.711      | 0.653 - 0.77  | < 0.001 |
| RNFL _1.2 | 0.749       | 0.693 - 0.805 | < 0.001 | 0.74       | 0.683 - 0.796 | < 0.001 |
| RNFL _1.3 | 0.752       | 0.697 - 0.808 | < 0.001 | 0.763      | 0.709 - 0.818 | < 0.001 |
| RNFL _1.4 | 0.744       | 0.689 - 0.8   | < 0.001 | 0.741      | 0.685 - 0.797 | < 0.001 |
| RNFL _1.5 | 0.733       | 0.677 - 0.79  | < 0.001 | 0.737      | 0.68 - 0.793  | < 0.001 |
| RNFL _1.6 | 0.737       | 0.681 - 0.794 | < 0.001 | 0.73       | 0.674 - 0.787 | < 0.001 |
| RNFL _1.7 | 0.756       | 0.702 - 0.811 | < 0.001 | 0.758      | 0.703 - 0.812 | < 0.001 |
| RNFL _1.8 | 0.77        | 0.716 - 0.823 | < 0.001 | 0.74       | 0.683 - 0.796 | < 0.001 |
| RNFL _2.1 | 0.695       | 0.635 - 0.756 | < 0.001 | 0.664      | 0.601 - 0.726 | < 0.001 |
| RNFL _2.2 | 0.725       | 0.667 - 0.783 | < 0.001 | 0.711      | 0.652 - 0.77  | < 0.001 |
| RNFL _2.3 | 0.721       | 0.662 - 0.779 | < 0.001 | 0.72       | 0.661 - 0.779 | < 0.001 |
| RNFL _2.4 | 0.727       | 0.67 - 0.785  | < 0.001 | 0.717      | 0.659 - 0.775 | < 0.001 |
| RNFL _2.5 | 0.736       | 0.68 - 0.793  | < 0.001 | 0.737      | 0.681 - 0.794 | < 0.001 |
| RNFL _2.6 | 0.723       | 0.665 - 0.781 | < 0.001 | 0.738      | 0.682 - 0.795 | < 0.001 |
| RNFL _2.7 | 0.718       | 0.66 - 0.777  | < 0.001 | 0.735      | 0.678 - 0.792 | < 0.001 |
| RNFL _2.8 | 0.783       | 0.731 - 0.835 | < 0.001 | 0.787      | 0.735 - 0.838 | < 0.001 |
| RNFL _3.1 | 0.615       | 0.55 - 0.679  | 0.001   | 0.543      | 0.477 - 0.609 | 0.205   |
| RNFL _3.2 | 0.648       | 0.585 - 0.711 | < 0.001 | 0.594      | 0.528 - 0.659 | 0.006   |
| RNFL _3.3 | 0.67        | 0.608 - 0.731 | < 0.001 | 0.65       | 0.587 - 0.713 | < 0.001 |
| RNFL _3.4 | 0.678       | 0.617 - 0.739 | < 0.001 | 0.675      | 0.614 - 0.736 | < 0.001 |
| RNFL _3.5 | 0.666       | 0.604 - 0.728 | < 0.001 | 0.669      | 0.608 - 0.731 | < 0.001 |
| RNFL _3.6 | 0.668       | 0.606 - 0.729 | < 0.001 | 0.676      | 0.615 - 0.737 | < 0.001 |
| RNFL _3.7 | 0.664       | 0.602 - 0.725 | < 0.001 | 0.674      | 0.613 - 0.735 | < 0.001 |
| RNFL _3.8 | 0.697       | 0.638 - 0.757 | < 0.001 | 0.71       | 0.652 - 0.769 | < 0.001 |
| RNFL _4.1 | 0.445       | 0.379 - 0.512 | 0.109   | 0.434      | 0.368 - 0.5   | 0.054   |
| RNFL _4.2 | 0.422       | 0.356 - 0.487 | 0.022   | 0.411      | 0.346 - 0.476 | 0.009   |
| RNFL _4.3 | 0.462       | 0.396 - 0.528 | 0.268   | 0.371      | 0.307 - 0.434 | < 0.001 |
| RNFL _4.4 | 0.524       | 0.458 - 0.591 | 0.473   | 0.509      | 0.443 - 0.575 | 0.79    |
| RNFL _4.5 | 0.506       | 0.44 - 0.572  | 0.86    | 0.503      | 0.436 - 0.569 | 0.936   |
| RNFL _4.6 | 0.562       | 0.496 - 0.628 | 0.07    | 0.576      | 0.511 - 0.642 | 0.025   |
| RNFL _4.7 | 0.563       | 0.497 - 0.629 | 0.065   | 0.597      | 0.532 - 0.662 | 0.004   |
| RNFL _4.8 | 0.612       | 0.548 - 0.676 | 0.001   | 0.633      | 0.569 - 0.696 | < 0.001 |
| RNFL _5.1 | 0.48        | 0.414 - 0.547 | 0.558   | 0.479      | 0.412 - 0.545 | 0.528   |
| RNFL _5.2 | 0.43        | 0.364 - 0.496 | 0.039   | 0.424      | 0.359 - 0.49  | 0.026   |

|          |       |               |         |       |               |         |
|----------|-------|---------------|---------|-------|---------------|---------|
| RNFL_5.3 | 0.332 | 0.27 - 0.394  | < 0.001 | 0.347 | 0.284 - 0.41  | < 0.001 |
| RNFL_5.4 | 0.499 | 0.433 - 0.566 | 0.98    | 0.519 | 0.453 - 0.585 | 0.577   |
| RNFL_5.5 | 0.55  | 0.485 - 0.616 | 0.138   | 0.542 | 0.476 - 0.608 | 0.218   |
| RNFL_5.6 | 0.57  | 0.504 - 0.636 | 0.04    | 0.565 | 0.499 - 0.631 | 0.056   |
| RNFL_5.7 | 0.569 | 0.504 - 0.635 | 0.042   | 0.555 | 0.489 - 0.621 | 0.107   |
| RNFL_5.8 | 0.628 | 0.564 - 0.691 | < 0.001 | 0.607 | 0.543 - 0.671 | 0.002   |
| RNFL_6.1 | 0.451 | 0.385 - 0.517 | 0.15    | 0.479 | 0.412 - 0.546 | 0.538   |
| RNFL_6.2 | 0.467 | 0.4 - 0.533   | 0.328   | 0.505 | 0.438 - 0.572 | 0.88    |
| RNFL_6.3 | 0.537 | 0.471 - 0.604 | 0.276   | 0.564 | 0.498 - 0.63  | 0.06    |
| RNFL_6.4 | 0.616 | 0.552 - 0.68  | 0.001   | 0.622 | 0.559 - 0.686 | < 0.001 |
| RNFL_6.5 | 0.635 | 0.572 - 0.699 | < 0.001 | 0.625 | 0.562 - 0.689 | < 0.001 |
| RNFL_6.6 | 0.616 | 0.552 - 0.68  | 0.001   | 0.597 | 0.533 - 0.662 | 0.004   |
| RNFL_6.7 | 0.634 | 0.57 - 0.697  | < 0.001 | 0.607 | 0.542 - 0.671 | 0.002   |
| RNFL_6.8 | 0.673 | 0.611 - 0.734 | < 0.001 | 0.662 | 0.601 - 0.724 | < 0.001 |
| RNFL_7.1 | 0.561 | 0.495 - 0.627 | 0.074   | 0.603 | 0.538 - 0.667 | 0.003   |
| RNFL_7.2 | 0.583 | 0.517 - 0.648 | 0.015   | 0.62  | 0.556 - 0.685 | < 0.001 |
| RNFL_7.3 | 0.628 | 0.564 - 0.691 | < 0.001 | 0.646 | 0.584 - 0.709 | < 0.001 |
| RNFL_7.4 | 0.661 | 0.6 - 0.723   | < 0.001 | 0.661 | 0.599 - 0.723 | < 0.001 |
| RNFL_7.5 | 0.653 | 0.59 - 0.715  | < 0.001 | 0.654 | 0.592 - 0.716 | < 0.001 |
| RNFL_7.6 | 0.676 | 0.615 - 0.737 | < 0.001 | 0.668 | 0.607 - 0.73  | < 0.001 |
| RNFL_7.7 | 0.689 | 0.629 - 0.749 | < 0.001 | 0.687 | 0.627 - 0.747 | < 0.001 |
| RNFL_7.8 | 0.759 | 0.705 - 0.813 | < 0.001 | 0.733 | 0.676 - 0.789 | < 0.001 |
| RNFL_8.1 | 0.597 | 0.532 - 0.662 | 0.004   | 0.624 | 0.56 - 0.688  | < 0.001 |
| RNFL_8.2 | 0.645 | 0.583 - 0.708 | < 0.001 | 0.667 | 0.605 - 0.729 | < 0.001 |
| RNFL_8.3 | 0.68  | 0.619 - 0.74  | < 0.001 | 0.684 | 0.624 - 0.745 | < 0.001 |
| RNFL_8.4 | 0.689 | 0.629 - 0.749 | < 0.001 | 0.694 | 0.634 - 0.753 | < 0.001 |
| RNFL_8.5 | 0.694 | 0.635 - 0.753 | < 0.001 | 0.705 | 0.647 - 0.764 | < 0.001 |
| RNFL_8.6 | 0.721 | 0.664 - 0.778 | < 0.001 | 0.717 | 0.659 - 0.775 | < 0.001 |
| RNFL_8.7 | 0.738 | 0.682 - 0.794 | < 0.001 | 0.744 | 0.688 - 0.799 | < 0.001 |
| RNFL_8.8 | 0.73  | 0.673 - 0.787 | < 0.001 | 0.759 | 0.705 - 0.814 | < 0.001 |

**Table S2.** Area Under the Receiver Operating Characteristic Curve (AUROC) value, 95% Confidence Interval (CI) and p-value for each cell of the 8x8 macular grid of the Ganglion Cell Layer (GCL) with the grid tilted at 7° and with the grid horizontalized.

|         | INCLINED 7° |               |         | HORIZONTAL |               |         |
|---------|-------------|---------------|---------|------------|---------------|---------|
|         | AUROC       | CI 95%        | P-value | AUROC      | CI 95%        | p-value |
| GCL_1.1 | 0.663       | 0.6 - 0.725   | < 0.001 | 0.662      | 0.6 - 0.724   | < 0.001 |
| GCL_1.2 | 0.661       | 0.599 - 0.724 | < 0.001 | 0.684      | 0.623 - 0.744 | < 0.001 |
| GCL_1.3 | 0.66        | 0.598 - 0.722 | < 0.001 | 0.681      | 0.62 - 0.742  | < 0.001 |
| GCL_1.4 | 0.678       | 0.616 - 0.739 | < 0.001 | 0.681      | 0.62 - 0.742  | < 0.001 |
| GCL_1.5 | 0.645       | 0.582 - 0.708 | < 0.001 | 0.664      | 0.602 - 0.727 | < 0.001 |
| GCL_1.6 | 0.572       | 0.506 - 0.638 | 0.035   | 0.596      | 0.53 - 0.661  | 0.005   |
| GCL_1.7 | 0.528       | 0.461 - 0.595 | 0.412   | 0.506      | 0.439 - 0.572 | 0.863   |
| GCL_1.8 | 0.517       | 0.451 - 0.583 | 0.617   | 0.52       | 0.453 - 0.586 | 0.56    |
| GCL_2.1 | 0.716       | 0.658 - 0.775 | < 0.001 | 0.717      | 0.659 - 0.776 | < 0.001 |
| GCL_2.2 | 0.728       | 0.671 - 0.786 | < 0.001 | 0.728      | 0.671 - 0.786 | < 0.001 |
| GCL_2.3 | 0.739       | 0.682 - 0.795 | < 0.001 | 0.746      | 0.69 - 0.802  | < 0.001 |
| GCL_2.4 | 0.731       | 0.674 - 0.789 | < 0.001 | 0.729      | 0.671 - 0.787 | < 0.001 |
| GCL_2.5 | 0.727       | 0.668 - 0.786 | < 0.001 | 0.725      | 0.666 - 0.784 | < 0.001 |
| GCL_2.6 | 0.693       | 0.632 - 0.753 | < 0.001 | 0.693      | 0.633 - 0.754 | < 0.001 |
| GCL_2.7 | 0.624       | 0.56 - 0.688  | < 0.001 | 0.627      | 0.562 - 0.691 | < 0.001 |
| GCL_2.8 | 0.517       | 0.45 - 0.584  | 0.616   | 0.481      | 0.414 - 0.548 | 0.574   |
| GCL_3.1 | 0.737       | 0.68 - 0.793  | < 0.001 | 0.746      | 0.689 - 0.802 | < 0.001 |
| GCL_3.2 | 0.761       | 0.706 - 0.815 | < 0.001 | 0.767      | 0.712 - 0.821 | < 0.001 |
| GCL_3.3 | 0.76        | 0.706 - 0.815 | < 0.001 | 0.764      | 0.709 - 0.819 | < 0.001 |
| GCL_3.4 | 0.754       | 0.698 - 0.809 | < 0.001 | 0.748      | 0.693 - 0.804 | < 0.001 |
| GCL_3.5 | 0.744       | 0.688 - 0.801 | < 0.001 | 0.752      | 0.696 - 0.808 | < 0.001 |
| GCL_3.6 | 0.689       | 0.628 - 0.75  | < 0.001 | 0.692      | 0.631 - 0.753 | < 0.001 |
| GCL_3.7 | 0.689       | 0.629 - 0.75  | < 0.001 | 0.68       | 0.619 - 0.741 | < 0.001 |
| GCL_3.8 | 0.655       | 0.592 - 0.718 | < 0.001 | 0.64       | 0.576 - 0.703 | < 0.001 |
| GCL_4.1 | 0.764       | 0.709 - 0.818 | < 0.001 | 0.735      | 0.679 - 0.792 | < 0.001 |
| GCL_4.2 | 0.78        | 0.727 - 0.833 | < 0.001 | 0.764      | 0.71 - 0.819  | < 0.001 |
| GCL_4.3 | 0.749       | 0.693 - 0.805 | < 0.001 | 0.747      | 0.691 - 0.803 | < 0.001 |
| GCL_4.4 | 0.676       | 0.615 - 0.737 | < 0.001 | 0.679      | 0.619 - 0.74  | < 0.001 |
| GCL_4.5 | 0.62        | 0.557 - 0.684 | < 0.001 | 0.627      | 0.563 - 0.69  | < 0.001 |
| GCL_4.6 | 0.659       | 0.596 - 0.721 | < 0.001 | 0.66       | 0.597 - 0.722 | < 0.001 |
| GCL_4.7 | 0.675       | 0.614 - 0.736 | < 0.001 | 0.678      | 0.617 - 0.739 | < 0.001 |
| GCL_4.8 | 0.669       | 0.607 - 0.73  | < 0.001 | 0.691      | 0.63 - 0.751  | < 0.001 |
| GCL_5.1 | 0.664       | 0.603 - 0.726 | < 0.001 | 0.657      | 0.595 - 0.719 | < 0.001 |
| GCL_5.2 | 0.729       | 0.672 - 0.787 | < 0.001 | 0.711      | 0.653 - 0.77  | < 0.001 |

|         |       |               |         |       |               |         |
|---------|-------|---------------|---------|-------|---------------|---------|
| GCL_5.3 | 0.724 | 0.666 - 0.781 | < 0.001 | 0.714 | 0.656 - 0.773 | < 0.001 |
| GCL_5.4 | 0.646 | 0.583 - 0.71  | < 0.001 | 0.643 | 0.58 - 0.706  | < 0.001 |
| GCL_5.5 | 0.632 | 0.569 - 0.696 | < 0.001 | 0.621 | 0.557 - 0.685 | < 0.001 |
| GCL_5.6 | 0.662 | 0.6 - 0.724   | < 0.001 | 0.655 | 0.592 - 0.718 | < 0.001 |
| GCL_5.7 | 0.656 | 0.593 - 0.718 | < 0.001 | 0.653 | 0.591 - 0.716 | < 0.001 |
| GCL_5.8 | 0.632 | 0.569 - 0.696 | < 0.001 | 0.647 | 0.584 - 0.709 | < 0.001 |
| GCL_6.1 | 0.691 | 0.631 - 0.751 | < 0.001 | 0.703 | 0.643 - 0.762 | < 0.001 |
| GCL_6.2 | 0.721 | 0.663 - 0.779 | < 0.001 | 0.724 | 0.667 - 0.782 | < 0.001 |
| GCL_6.3 | 0.729 | 0.672 - 0.787 | < 0.001 | 0.723 | 0.665 - 0.781 | < 0.001 |
| GCL_6.4 | 0.694 | 0.634 - 0.754 | < 0.001 | 0.686 | 0.626 - 0.747 | < 0.001 |
| GCL_6.5 | 0.662 | 0.6 - 0.724   | < 0.001 | 0.664 | 0.602 - 0.726 | < 0.001 |
| GCL_6.6 | 0.664 | 0.602 - 0.726 | < 0.001 | 0.664 | 0.602 - 0.726 | < 0.001 |
| GCL_6.7 | 0.652 | 0.59 - 0.715  | < 0.001 | 0.648 | 0.586 - 0.711 | < 0.001 |
| GCL_6.8 | 0.605 | 0.54 - 0.669  | 0.002   | 0.61  | 0.546 - 0.674 | 0.001   |
| GCL_7.1 | 0.68  | 0.62 - 0.741  | < 0.001 | 0.695 | 0.635 - 0.755 | < 0.001 |
| GCL_7.2 | 0.701 | 0.641 - 0.76  | < 0.001 | 0.695 | 0.635 - 0.755 | < 0.001 |
| GCL_7.3 | 0.721 | 0.664 - 0.779 | < 0.001 | 0.716 | 0.657 - 0.774 | < 0.001 |
| GCL_7.4 | 0.701 | 0.641 - 0.76  | < 0.001 | 0.695 | 0.636 - 0.755 | < 0.001 |
| GCL_7.5 | 0.681 | 0.62 - 0.742  | < 0.001 | 0.672 | 0.61 - 0.734  | < 0.001 |
| GCL_7.6 | 0.662 | 0.6 - 0.724   | < 0.001 | 0.66  | 0.598 - 0.722 | < 0.001 |
| GCL_7.7 | 0.666 | 0.604 - 0.727 | < 0.001 | 0.623 | 0.559 - 0.687 | < 0.001 |
| GCL_7.8 | 0.527 | 0.46 - 0.593  | 0.432   | 0.537 | 0.471 - 0.603 | 0.274   |
| GCL_8.1 | 0.686 | 0.625 - 0.747 | < 0.001 | 0.643 | 0.58 - 0.707  | < 0.001 |
| GCL_8.2 | 0.65  | 0.587 - 0.713 | < 0.001 | 0.651 | 0.589 - 0.714 | < 0.001 |
| GCL_8.3 | 0.652 | 0.589 - 0.714 | < 0.001 | 0.665 | 0.603 - 0.726 | < 0.001 |
| GCL_8.4 | 0.671 | 0.609 - 0.732 | < 0.001 | 0.666 | 0.604 - 0.727 | < 0.001 |
| GCL_8.5 | 0.678 | 0.617 - 0.739 | < 0.001 | 0.681 | 0.62 - 0.742  | < 0.001 |
| GCL_8.6 | 0.653 | 0.591 - 0.715 | < 0.001 | 0.658 | 0.596 - 0.72  | < 0.001 |
| GCL_8.7 | 0.597 | 0.531 - 0.662 | 0.005   | 0.615 | 0.551 - 0.679 | 0.001   |
| GCL_8.8 | 0.51  | 0.443 - 0.577 | 0.773   | 0.47  | 0.404 - 0.537 | 0.382   |

**Table S3.** Area Under the Receiver Operating Characteristic Curve (AUROC) value, 95% Confidence Interval (CI) and p-value for each cell of the 8x8 macular grid of the entire retina with the grid tilted at 7° and with the grid horizontalized.

|            | INCLINED 7° |               |         | HORIZONTAL |               |         |
|------------|-------------|---------------|---------|------------|---------------|---------|
|            | AUROC       | CI 95%        | p-value | AUROC      | CI 95%        | p-value |
| RETINA_1.1 | 0.594       | 0.529 - 0.659 | 0.006   | 0.6        | 0.535 - 0.665 | 0.003   |
| RETINA_1.2 | 0.622       | 0.558 - 0.686 | < 0.001 | 0.609      | 0.544 - 0.673 | 0.001   |
| RETINA_1.3 | 0.66        | 0.598 - 0.722 | < 0.001 | 0.662      | 0.6 - 0.724   | < 0.001 |
| RETINA_1.4 | 0.672       | 0.61 - 0.733  | < 0.001 | 0.667      | 0.605 - 0.729 | < 0.001 |
| RETINA_1.5 | 0.682       | 0.621 - 0.743 | < 0.001 | 0.676      | 0.614 - 0.737 | < 0.001 |
| RETINA_1.6 | 0.706       | 0.648 - 0.765 | < 0.001 | 0.693      | 0.634 - 0.753 | < 0.001 |
| RETINA_1.7 | 0.726       | 0.668 - 0.783 | < 0.001 | 0.722      | 0.664 - 0.779 | < 0.001 |
| RETINA_1.8 | 0.719       | 0.661 - 0.777 | < 0.001 | 0.711      | 0.652 - 0.769 | < 0.001 |
| RETINA_2.1 | 0.606       | 0.541 - 0.67  | 0.002   | 0.602      | 0.537 - 0.666 | 0.003   |
| RETINA_2.2 | 0.648       | 0.585 - 0.711 | < 0.001 | 0.635      | 0.571 - 0.698 | < 0.001 |
| RETINA_2.3 | 0.665       | 0.603 - 0.726 | < 0.001 | 0.661      | 0.599 - 0.723 | < 0.001 |
| RETINA_2.4 | 0.657       | 0.595 - 0.719 | < 0.001 | 0.652      | 0.589 - 0.714 | < 0.001 |
| RETINA_2.5 | 0.671       | 0.609 - 0.733 | < 0.001 | 0.666      | 0.604 - 0.728 | < 0.001 |
| RETINA_2.6 | 0.683       | 0.622 - 0.744 | < 0.001 | 0.686      | 0.625 - 0.746 | < 0.001 |
| RETINA_2.7 | 0.701       | 0.642 - 0.761 | < 0.001 | 0.705      | 0.646 - 0.764 | < 0.001 |
| RETINA_2.8 | 0.763       | 0.709 - 0.817 | < 0.001 | 0.752      | 0.697 - 0.808 | < 0.001 |
| RETINA_3.1 | 0.603       | 0.538 - 0.668 | 0.003   | 0.584      | 0.519 - 0.649 | 0.014   |
| RETINA_3.2 | 0.64        | 0.577 - 0.703 | < 0.001 | 0.627      | 0.563 - 0.69  | < 0.001 |
| RETINA_3.3 | 0.652       | 0.59 - 0.715  | < 0.001 | 0.648      | 0.585 - 0.711 | < 0.001 |
| RETINA_3.4 | 0.669       | 0.607 - 0.731 | < 0.001 | 0.661      | 0.599 - 0.724 | < 0.001 |
| RETINA_3.5 | 0.654       | 0.591 - 0.716 | < 0.001 | 0.666      | 0.604 - 0.728 | < 0.001 |
| RETINA_3.6 | 0.634       | 0.571 - 0.698 | < 0.001 | 0.641      | 0.578 - 0.704 | < 0.001 |
| RETINA_3.7 | 0.661       | 0.599 - 0.723 | < 0.001 | 0.664      | 0.603 - 0.726 | < 0.001 |
| RETINA_3.8 | 0.689       | 0.629 - 0.748 | < 0.001 | 0.711      | 0.652 - 0.769 | < 0.001 |
| RETINA_4.1 | 0.58        | 0.515 - 0.645 | 0.019   | 0.567      | 0.501 - 0.632 | 0.05    |
| RETINA_4.2 | 0.623       | 0.559 - 0.686 | < 0.001 | 0.604      | 0.539 - 0.668 | 0.002   |
| RETINA_4.3 | 0.629       | 0.565 - 0.692 | < 0.001 | 0.616      | 0.552 - 0.68  | 0.001   |
| RETINA_4.4 | 0.567       | 0.501 - 0.633 | 0.05    | 0.561      | 0.496 - 0.627 | 0.071   |
| RETINA_4.5 | 0.534       | 0.467 - 0.6   | 0.325   | 0.54       | 0.474 - 0.606 | 0.243   |
| RETINA_4.6 | 0.573       | 0.507 - 0.638 | 0.032   | 0.576      | 0.51 - 0.641  | 0.026   |
| RETINA_4.7 | 0.595       | 0.53 - 0.66   | 0.005   | 0.611      | 0.546 - 0.675 | 0.001   |
| RETINA_4.8 | 0.608       | 0.544 - 0.673 | 0.001   | 0.638      | 0.574 - 0.701 | < 0.001 |
| RETINA_5.1 | 0.555       | 0.489 - 0.621 | 0.107   | 0.557      | 0.491 - 0.623 | 0.094   |
| RETINA_5.2 | 0.577       | 0.511 - 0.642 | 0.025   | 0.582      | 0.517 - 0.648 | 0.015   |
| RETINA_5.3 | 0.591       | 0.526 - 0.656 | 0.008   | 0.595      | 0.53 - 0.66   | 0.005   |
| RETINA_5.4 | 0.542       | 0.476 - 0.608 | 0.217   | 0.542      | 0.476 - 0.608 | 0.216   |

|            |       |               |         |       |               |         |
|------------|-------|---------------|---------|-------|---------------|---------|
| RETINA_5.5 | 0.548 | 0.482 - 0.614 | 0.162   | 0.544 | 0.478 - 0.61  | 0.199   |
| RETINA_5.6 | 0.566 | 0.5 - 0.631   | 0.054   | 0.563 | 0.497 - 0.629 | 0.065   |
| RETINA_5.7 | 0.578 | 0.513 - 0.643 | 0.022   | 0.575 | 0.509 - 0.64  | 0.028   |
| RETINA_5.8 | 0.602 | 0.538 - 0.667 | 0.003   | 0.587 | 0.522 - 0.653 | 0.01    |
| RETINA_6.1 | 0.563 | 0.497 - 0.629 | 0.066   | 0.575 | 0.509 - 0.641 | 0.028   |
| RETINA_6.2 | 0.601 | 0.536 - 0.665 | 0.003   | 0.606 | 0.541 - 0.67  | 0.002   |
| RETINA_6.3 | 0.615 | 0.552 - 0.679 | 0.001   | 0.616 | 0.552 - 0.68  | 0.001   |
| RETINA_6.4 | 0.611 | 0.547 - 0.676 | 0.001   | 0.612 | 0.548 - 0.676 | 0.001   |
| RETINA_6.5 | 0.6   | 0.536 - 0.665 | 0.003   | 0.596 | 0.532 - 0.661 | 0.005   |
| RETINA_6.6 | 0.607 | 0.542 - 0.671 | 0.002   | 0.599 | 0.534 - 0.663 | 0.004   |
| RETINA_6.7 | 0.624 | 0.56 - 0.687  | < 0.001 | 0.604 | 0.54 - 0.669  | 0.002   |
| RETINA_6.8 | 0.641 | 0.578 - 0.704 | < 0.001 | 0.637 | 0.574 - 0.7   | < 0.001 |
| RETINA_7.1 | 0.57  | 0.505 - 0.636 | 0.039   | 0.58  | 0.514 - 0.645 | 0.019   |
| RETINA_7.2 | 0.61  | 0.545 - 0.674 | 0.001   | 0.608 | 0.544 - 0.673 | 0.001   |
| RETINA_7.3 | 0.624 | 0.56 - 0.688  | < 0.001 | 0.62  | 0.556 - 0.684 | < 0.001 |
| RETINA_7.4 | 0.624 | 0.56 - 0.688  | < 0.001 | 0.629 | 0.565 - 0.692 | < 0.001 |
| RETINA_7.5 | 0.633 | 0.569 - 0.696 | < 0.001 | 0.63  | 0.566 - 0.693 | < 0.001 |
| RETINA_7.6 | 0.635 | 0.572 - 0.698 | < 0.001 | 0.634 | 0.571 - 0.697 | < 0.001 |
| RETINA_7.7 | 0.665 | 0.604 - 0.727 | < 0.001 | 0.662 | 0.6 - 0.724   | < 0.001 |
| RETINA_7.8 | 0.704 | 0.646 - 0.763 | < 0.001 | 0.684 | 0.624 - 0.745 | < 0.001 |
| RETINA_8.1 | 0.58  | 0.514 - 0.645 | 0.019   | 0.588 | 0.523 - 0.653 | 0.01    |
| RETINA_8.2 | 0.603 | 0.538 - 0.667 | 0.003   | 0.62  | 0.556 - 0.684 | < 0.001 |
| RETINA_8.3 | 0.639 | 0.576 - 0.702 | < 0.001 | 0.645 | 0.583 - 0.708 | < 0.001 |
| RETINA_8.4 | 0.648 | 0.585 - 0.71  | < 0.001 | 0.655 | 0.593 - 0.718 | < 0.001 |
| RETINA_8.5 | 0.666 | 0.604 - 0.727 | < 0.001 | 0.673 | 0.612 - 0.734 | < 0.001 |
| RETINA_8.6 | 0.689 | 0.629 - 0.749 | < 0.001 | 0.69  | 0.63 - 0.749  | < 0.001 |
| RETINA_8.7 | 0.706 | 0.648 - 0.765 | < 0.001 | 0.706 | 0.647 - 0.764 | < 0.001 |
| RETINA_8.8 | 0.698 | 0.639 - 0.757 | < 0.001 | 0.707 | 0.648 - 0.766 | < 0.001 |

**Table S4.** Area Under the Receiver Operating Characteristic Curve (AUROC) value, 95% Confidence Interval (CI) and p-value for each cell of the 8x8 macular grid of the ganglion cell complex (RNFL+GCL+IPL) with the grid tilted at 7° and with the grid horizontalized.

|                  | INCLINED 7° |               |         | HORIZONTAL |               |         |
|------------------|-------------|---------------|---------|------------|---------------|---------|
|                  | AUROC       | CI 95%        | p-value | AUROC      | CI 95%        | p-value |
| RNFL+GCL+IPL_1.1 | 0.659       | 0.597 - 0.722 | < 0.001 | 0.66       | 0.597 - 0.722 | < 0.001 |
| RNFL+GCL+IPL_1.2 | 0.717       | 0.659 - 0.775 | < 0.001 | 0.712      | 0.654 - 0.771 | < 0.001 |
| RNFL+GCL+IPL_1.3 | 0.737       | 0.681 - 0.794 | < 0.001 | 0.744      | 0.688 - 0.801 | < 0.001 |
| RNFL+GCL+IPL_1.4 | 0.733       | 0.676 - 0.79  | < 0.001 | 0.728      | 0.671 - 0.786 | < 0.001 |
| RNFL+GCL+IPL_1.5 | 0.726       | 0.668 - 0.783 | < 0.001 | 0.724      | 0.667 - 0.782 | < 0.001 |
| RNFL+GCL+IPL_1.6 | 0.737       | 0.68 - 0.793  | < 0.001 | 0.722      | 0.664 - 0.779 | < 0.001 |
| RNFL+GCL+IPL_1.7 | 0.759       | 0.704 - 0.813 | < 0.001 | 0.76       | 0.706 - 0.814 | < 0.001 |
| RNFL+GCL+IPL_1.8 | 0.762       | 0.707 - 0.816 | < 0.001 | 0.743      | 0.687 - 0.799 | < 0.001 |
| RNFL+GCL+IPL_2.1 | 0.69        | 0.63 - 0.751  | < 0.001 | 0.682      | 0.62 - 0.743  | < 0.001 |
| RNFL+GCL+IPL_2.2 | 0.739       | 0.682 - 0.796 | < 0.001 | 0.716      | 0.657 - 0.774 | < 0.001 |
| RNFL+GCL+IPL_2.3 | 0.739       | 0.683 - 0.796 | < 0.001 | 0.745      | 0.689 - 0.801 | < 0.001 |
| RNFL+GCL+IPL_2.4 | 0.738       | 0.682 - 0.795 | < 0.001 | 0.729      | 0.671 - 0.786 | < 0.001 |
| RNFL+GCL+IPL_2.5 | 0.755       | 0.699 - 0.81  | < 0.001 | 0.751      | 0.696 - 0.807 | < 0.001 |
| RNFL+GCL+IPL_2.6 | 0.734       | 0.677 - 0.791 | < 0.001 | 0.739      | 0.683 - 0.796 | < 0.001 |
| RNFL+GCL+IPL_2.7 | 0.725       | 0.667 - 0.783 | < 0.001 | 0.737      | 0.68 - 0.793  | < 0.001 |
| RNFL+GCL+IPL_2.8 | 0.785       | 0.733 - 0.837 | < 0.001 | 0.778      | 0.726 - 0.831 | < 0.001 |
| RNFL+GCL+IPL_3.1 | 0.676       | 0.615 - 0.737 | < 0.001 | 0.674      | 0.613 - 0.735 | < 0.001 |
| RNFL+GCL+IPL_3.2 | 0.719       | 0.661 - 0.777 | < 0.001 | 0.72       | 0.661 - 0.778 | < 0.001 |
| RNFL+GCL+IPL_3.3 | 0.744       | 0.688 - 0.8   | < 0.001 | 0.742      | 0.685 - 0.799 | < 0.001 |
| RNFL+GCL+IPL_3.4 | 0.742       | 0.685 - 0.798 | < 0.001 | 0.737      | 0.681 - 0.794 | < 0.001 |
| RNFL+GCL+IPL_3.5 | 0.724       | 0.665 - 0.782 | < 0.001 | 0.726      | 0.669 - 0.784 | < 0.001 |
| RNFL+GCL+IPL_3.6 | 0.693       | 0.633 - 0.754 | < 0.001 | 0.698      | 0.638 - 0.758 | < 0.001 |
| RNFL+GCL+IPL_3.7 | 0.702       | 0.642 - 0.761 | < 0.001 | 0.706      | 0.647 - 0.765 | < 0.001 |
| RNFL+GCL+IPL_3.8 | 0.712       | 0.653 - 0.77  | < 0.001 | 0.727      | 0.67 - 0.784  | < 0.001 |
| RNFL+GCL+IPL_4.1 | 0.681       | 0.62 - 0.742  | < 0.001 | 0.677      | 0.616 - 0.738 | < 0.001 |
| RNFL+GCL+IPL_4.2 | 0.74        | 0.684 - 0.797 | < 0.001 | 0.728      | 0.67 - 0.786  | < 0.001 |
| RNFL+GCL+IPL_4.3 | 0.722       | 0.664 - 0.779 | < 0.001 | 0.71       | 0.651 - 0.769 | < 0.001 |
| RNFL+GCL+IPL_4.4 | 0.648       | 0.585 - 0.711 | < 0.001 | 0.647      | 0.584 - 0.71  | < 0.001 |
| RNFL+GCL+IPL_4.5 | 0.606       | 0.541 - 0.67  | 0.002   | 0.609      | 0.545 - 0.674 | 0.001   |
| RNFL+GCL+IPL_4.6 | 0.647       | 0.584 - 0.71  | < 0.001 | 0.648      | 0.585 - 0.711 | < 0.001 |
| RNFL+GCL+IPL_4.7 | 0.646       | 0.582 - 0.709 | < 0.001 | 0.657      | 0.594 - 0.719 | < 0.001 |
| RNFL+GCL+IPL_4.8 | 0.635       | 0.572 - 0.698 | < 0.001 | 0.656      | 0.594 - 0.718 | < 0.001 |
| RNFL+GCL+IPL_5.1 | 0.662       | 0.601 - 0.724 | < 0.001 | 0.655      | 0.593 - 0.717 | < 0.001 |
| RNFL+GCL+IPL_5.2 | 0.698       | 0.638 - 0.758 | < 0.001 | 0.688      | 0.628 - 0.748 | < 0.001 |
| RNFL+GCL+IPL_5.3 | 0.691       | 0.631 - 0.752 | < 0.001 | 0.688      | 0.627 - 0.748 | < 0.001 |
| RNFL+GCL+IPL_5.4 | 0.631       | 0.568 - 0.695 | < 0.001 | 0.631      | 0.567 - 0.694 | < 0.001 |

|                   |       |               |         |       |               |         |
|-------------------|-------|---------------|---------|-------|---------------|---------|
| RNFL+GCL+IPL _5.5 | 0.628 | 0.564 - 0.692 | < 0.001 | 0.616 | 0.552 - 0.68  | 0.001   |
| RNFL+GCL+IPL _5.6 | 0.652 | 0.589 - 0.714 | < 0.001 | 0.647 | 0.584 - 0.71  | < 0.001 |
| RNFL+GCL+IPL _5.7 | 0.641 | 0.578 - 0.704 | < 0.001 | 0.639 | 0.576 - 0.703 | < 0.001 |
| RNFL+GCL+IPL _5.8 | 0.644 | 0.581 - 0.707 | < 0.001 | 0.636 | 0.573 - 0.699 | < 0.001 |
| RNFL+GCL+IPL _6.1 | 0.639 | 0.577 - 0.702 | < 0.001 | 0.641 | 0.579 - 0.704 | < 0.001 |
| RNFL+GCL+IPL _6.2 | 0.687 | 0.627 - 0.747 | < 0.001 | 0.685 | 0.625 - 0.745 | < 0.001 |
| RNFL+GCL+IPL _6.3 | 0.7   | 0.641 - 0.76  | < 0.001 | 0.691 | 0.631 - 0.752 | < 0.001 |
| RNFL+GCL+IPL _6.4 | 0.687 | 0.627 - 0.748 | < 0.001 | 0.687 | 0.626 - 0.748 | < 0.001 |
| RNFL+GCL+IPL _6.5 | 0.683 | 0.622 - 0.744 | < 0.001 | 0.678 | 0.616 - 0.739 | < 0.001 |
| RNFL+GCL+IPL _6.6 | 0.668 | 0.607 - 0.73  | < 0.001 | 0.657 | 0.595 - 0.719 | < 0.001 |
| RNFL+GCL+IPL _6.7 | 0.661 | 0.599 - 0.723 | < 0.001 | 0.642 | 0.579 - 0.705 | < 0.001 |
| RNFL+GCL+IPL _6.8 | 0.674 | 0.613 - 0.735 | < 0.001 | 0.668 | 0.607 - 0.73  | < 0.001 |
| RNFL+GCL+IPL _7.1 | 0.627 | 0.564 - 0.691 | < 0.001 | 0.654 | 0.592 - 0.717 | < 0.001 |
| RNFL+GCL+IPL _7.2 | 0.67  | 0.608 - 0.731 | < 0.001 | 0.664 | 0.603 - 0.726 | < 0.001 |
| RNFL+GCL+IPL _7.3 | 0.692 | 0.632 - 0.751 | < 0.001 | 0.692 | 0.633 - 0.752 | < 0.001 |
| RNFL+GCL+IPL _7.4 | 0.689 | 0.629 - 0.749 | < 0.001 | 0.693 | 0.633 - 0.752 | < 0.001 |
| RNFL+GCL+IPL _7.5 | 0.693 | 0.633 - 0.753 | < 0.001 | 0.686 | 0.626 - 0.747 | < 0.001 |
| RNFL+GCL+IPL _7.6 | 0.692 | 0.632 - 0.752 | < 0.001 | 0.688 | 0.627 - 0.748 | < 0.001 |
| RNFL+GCL+IPL _7.7 | 0.697 | 0.638 - 0.757 | < 0.001 | 0.694 | 0.634 - 0.753 | < 0.001 |
| RNFL+GCL+IPL _7.8 | 0.743 | 0.688 - 0.798 | < 0.001 | 0.72  | 0.663 - 0.778 | < 0.001 |
| RNFL+GCL+IPL _8.1 | 0.626 | 0.562 - 0.69  | < 0.001 | 0.627 | 0.563 - 0.691 | < 0.001 |
| RNFL+GCL+IPL _8.2 | 0.652 | 0.589 - 0.714 | < 0.001 | 0.668 | 0.606 - 0.729 | < 0.001 |
| RNFL+GCL+IPL _8.3 | 0.686 | 0.625 - 0.746 | < 0.001 | 0.686 | 0.626 - 0.747 | < 0.001 |
| RNFL+GCL+IPL _8.4 | 0.697 | 0.638 - 0.757 | < 0.001 | 0.699 | 0.64 - 0.759  | < 0.001 |
| RNFL+GCL+IPL _8.5 | 0.709 | 0.65 - 0.768  | < 0.001 | 0.716 | 0.658 - 0.774 | < 0.001 |
| RNFL+GCL+IPL _8.6 | 0.724 | 0.667 - 0.781 | < 0.001 | 0.725 | 0.668 - 0.782 | < 0.001 |
| RNFL+GCL+IPL _8.7 | 0.739 | 0.683 - 0.796 | < 0.001 | 0.738 | 0.682 - 0.794 | < 0.001 |
| RNFL+GCL+IPL _8.8 | 0.726 | 0.669 - 0.784 | < 0.001 | 0.751 | 0.696 - 0.806 | < 0.001 |



**Table S5. Area** Under the Receiver Operating Characteristic Curve (AUROC) value, 95% Confidence Interval (CI) and p-value for each cell of the 8x8 macular grid of the ganglion cell layer+inner plexiform layer (GCL IPL) with the grid tilted at 7° and with the grid horizontalized.

|              | INCLINED 7° |               |         | HORIZONTAL |               |         |
|--------------|-------------|---------------|---------|------------|---------------|---------|
|              | AUROC       | CI 95%        | p-value | AUROC      | CI 95%        | p-value |
| GCL IPL _1.1 | 0.563       | 0.497 - 0.629 | 0.064   | 0.575      | 0.509 - 0.64  | 0.029   |
| GCL IPL _1.2 | 0.588       | 0.523 - 0.654 | 0.009   | 0.61       | 0.545 - 0.675 | 0.001   |
| GCL IPL _1.3 | 0.62        | 0.555 - 0.684 | < 0.001 | 0.635      | 0.571 - 0.699 | < 0.001 |
| GCL IPL _1.4 | 0.651       | 0.588 - 0.714 | < 0.001 | 0.658      | 0.595 - 0.721 | < 0.001 |
| GCL IPL _1.5 | 0.628       | 0.564 - 0.692 | < 0.001 | 0.637      | 0.573 - 0.7   | < 0.001 |
| GCL IPL _1.6 | 0.557       | 0.491 - 0.623 | 0.095   | 0.569      | 0.503 - 0.635 | 0.044   |
| GCL IPL _1.7 | 0.473       | 0.406 - 0.54  | 0.431   | 0.48       | 0.413 - 0.547 | 0.559   |
| GCL IPL _1.8 | 0.494       | 0.427 - 0.561 | 0.858   | 0.501      | 0.434 - 0.568 | 0.98    |
| GCL IPL _2.1 | 0.641       | 0.577 - 0.704 | < 0.001 | 0.659      | 0.597 - 0.721 | < 0.001 |
| GCL IPL _2.2 | 0.704       | 0.644 - 0.763 | < 0.001 | 0.691      | 0.631 - 0.752 | < 0.001 |
| GCL IPL _2.3 | 0.72        | 0.662 - 0.778 | < 0.001 | 0.732      | 0.675 - 0.789 | < 0.001 |
| GCL IPL _2.4 | 0.717       | 0.658 - 0.775 | < 0.001 | 0.709      | 0.65 - 0.768  | < 0.001 |
| GCL IPL _2.5 | 0.726       | 0.668 - 0.785 | < 0.001 | 0.726      | 0.667 - 0.785 | < 0.001 |
| GCL IPL _2.6 | 0.691       | 0.63 - 0.751  | < 0.001 | 0.686      | 0.625 - 0.747 | < 0.001 |
| GCL IPL _2.7 | 0.609       | 0.545 - 0.674 | 0.001   | 0.615      | 0.55 - 0.68   | 0.001   |
| GCL IPL _2.8 | 0.47        | 0.403 - 0.537 | 0.374   | 0.42       | 0.354 - 0.486 | 0.019   |
| GCL IPL _3.1 | 0.698       | 0.638 - 0.758 | < 0.001 | 0.706      | 0.647 - 0.765 | < 0.001 |
| GCL IPL _3.2 | 0.738       | 0.681 - 0.795 | < 0.001 | 0.745      | 0.689 - 0.802 | < 0.001 |
| GCL IPL _3.3 | 0.75        | 0.693 - 0.806 | < 0.001 | 0.749      | 0.693 - 0.806 | < 0.001 |
| GCL IPL _3.4 | 0.752       | 0.696 - 0.808 | < 0.001 | 0.746      | 0.69 - 0.803  | < 0.001 |
| GCL IPL _3.5 | 0.732       | 0.674 - 0.79  | < 0.001 | 0.737      | 0.68 - 0.794  | < 0.001 |
| GCL IPL _3.6 | 0.686       | 0.626 - 0.747 | < 0.001 | 0.688      | 0.628 - 0.749 | < 0.001 |
| GCL IPL _3.7 | 0.68        | 0.619 - 0.741 | < 0.001 | 0.677      | 0.615 - 0.738 | < 0.001 |
| GCL IPL _3.8 | 0.619       | 0.555 - 0.683 | < 0.001 | 0.632      | 0.568 - 0.696 | < 0.001 |
| GCL IPL _4.1 | 0.737       | 0.68 - 0.793  | < 0.001 | 0.729      | 0.672 - 0.787 | < 0.001 |
| GCL IPL _4.2 | 0.774       | 0.72 - 0.828  | < 0.001 | 0.763      | 0.708 - 0.818 | < 0.001 |
| GCL IPL _4.3 | 0.736       | 0.679 - 0.792 | < 0.001 | 0.73       | 0.673 - 0.788 | < 0.001 |
| GCL IPL _4.4 | 0.663       | 0.601 - 0.725 | < 0.001 | 0.665      | 0.603 - 0.727 | < 0.001 |
| GCL IPL _4.5 | 0.612       | 0.548 - 0.676 | 0.001   | 0.618      | 0.554 - 0.682 | 0.001   |
| GCL IPL _4.6 | 0.66        | 0.598 - 0.723 | < 0.001 | 0.658      | 0.595 - 0.72  | < 0.001 |
| GCL IPL _4.7 | 0.661       | 0.599 - 0.723 | < 0.001 | 0.66       | 0.598 - 0.722 | < 0.001 |
| GCL IPL _4.8 | 0.627       | 0.564 - 0.691 | < 0.001 | 0.642      | 0.579 - 0.705 | < 0.001 |
| GCL IPL _5.1 | 0.705       | 0.646 - 0.764 | < 0.001 | 0.698      | 0.639 - 0.758 | < 0.001 |
| GCL IPL _5.2 | 0.729       | 0.671 - 0.786 | < 0.001 | 0.707      | 0.648 - 0.766 | < 0.001 |
| GCL IPL _5.3 | 0.711       | 0.652 - 0.769 | < 0.001 | 0.702      | 0.643 - 0.762 | < 0.001 |
| GCL IPL _5.4 | 0.645       | 0.582 - 0.708 | < 0.001 | 0.643      | 0.58 - 0.706  | < 0.001 |

|              |       |               |         |       |               |         |
|--------------|-------|---------------|---------|-------|---------------|---------|
| GCL IPL _5.5 | 0.636 | 0.572 - 0.699 | < 0.001 | 0.622 | 0.558 - 0.686 | < 0.001 |
| GCL IPL _5.6 | 0.657 | 0.595 - 0.72  | < 0.001 | 0.651 | 0.588 - 0.714 | < 0.001 |
| GCL IPL _5.7 | 0.65  | 0.587 - 0.713 | < 0.001 | 0.64  | 0.576 - 0.703 | < 0.001 |
| GCL IPL _5.8 | 0.607 | 0.542 - 0.671 | 0.002   | 0.621 | 0.557 - 0.684 | < 0.001 |
| GCL IPL _6.1 | 0.687 | 0.627 - 0.747 | < 0.001 | 0.678 | 0.617 - 0.739 | < 0.001 |
| GCL IPL _6.2 | 0.713 | 0.655 - 0.771 | < 0.001 | 0.717 | 0.659 - 0.775 | < 0.001 |
| GCL IPL _6.3 | 0.72  | 0.662 - 0.779 | < 0.001 | 0.711 | 0.652 - 0.77  | < 0.001 |
| GCL IPL _6.4 | 0.687 | 0.626 - 0.747 | < 0.001 | 0.683 | 0.622 - 0.744 | < 0.001 |
| GCL IPL _6.5 | 0.669 | 0.607 - 0.73  | < 0.001 | 0.669 | 0.607 - 0.731 | < 0.001 |
| GCL IPL _6.6 | 0.661 | 0.599 - 0.723 | < 0.001 | 0.654 | 0.592 - 0.717 | < 0.001 |
| GCL IPL _6.7 | 0.649 | 0.587 - 0.712 | < 0.001 | 0.633 | 0.569 - 0.696 | < 0.001 |
| GCL IPL _6.8 | 0.578 | 0.512 - 0.643 | 0.023   | 0.58  | 0.514 - 0.645 | 0.019   |
| GCL IPL _7.1 | 0.637 | 0.574 - 0.7   | < 0.001 | 0.652 | 0.589 - 0.715 | < 0.001 |
| GCL IPL _7.2 | 0.685 | 0.625 - 0.745 | < 0.001 | 0.673 | 0.612 - 0.734 | < 0.001 |
| GCL IPL _7.3 | 0.702 | 0.643 - 0.762 | < 0.001 | 0.697 | 0.638 - 0.757 | < 0.001 |
| GCL IPL _7.4 | 0.685 | 0.625 - 0.745 | < 0.001 | 0.682 | 0.621 - 0.742 | < 0.001 |
| GCL IPL _7.5 | 0.677 | 0.616 - 0.738 | < 0.001 | 0.67  | 0.608 - 0.732 | < 0.001 |
| GCL IPL _7.6 | 0.655 | 0.592 - 0.717 | < 0.001 | 0.653 | 0.591 - 0.716 | < 0.001 |
| GCL IPL _7.7 | 0.649 | 0.586 - 0.712 | < 0.001 | 0.614 | 0.549 - 0.678 | 0.001   |
| GCL IPL _7.8 | 0.508 | 0.441 - 0.575 | 0.82    | 0.487 | 0.42 - 0.553  | 0.697   |
| GCL IPL _8.1 | 0.618 | 0.553 - 0.682 | 0.001   | 0.595 | 0.53 - 0.66   | 0.005   |
| GCL IPL _8.2 | 0.617 | 0.552 - 0.681 | 0.001   | 0.629 | 0.565 - 0.693 | < 0.001 |
| GCL IPL _8.3 | 0.645 | 0.582 - 0.707 | < 0.001 | 0.639 | 0.576 - 0.701 | < 0.001 |
| GCL IPL _8.4 | 0.649 | 0.586 - 0.711 | < 0.001 | 0.645 | 0.583 - 0.708 | < 0.001 |
| GCL IPL _8.5 | 0.671 | 0.61 - 0.732  | < 0.001 | 0.663 | 0.601 - 0.725 | < 0.001 |
| GCL IPL _8.6 | 0.624 | 0.56 - 0.688  | < 0.001 | 0.625 | 0.562 - 0.689 | < 0.001 |
| GCL IPL _8.7 | 0.565 | 0.498 - 0.631 | 0.057   | 0.568 | 0.502 - 0.635 | 0.045   |
| GCL IPL _8.8 | 0.468 | 0.401 - 0.536 | 0.35    | 0.426 | 0.359 - 0.492 | 0.029   |

**Table S6.** Area Under the Receiver Operating Characteristic Curve (AUROC) value, 95% Confidence Interval (CI) and p-value for each cell of the 8x8 macular grid of the outer plexiform layer+outer nuclear layer (OPLONL) with the grid tilted at 7° and with the grid horizontalized.

|            | INCLINED 7° |               |         | HORIZONTAL |               |         |
|------------|-------------|---------------|---------|------------|---------------|---------|
|            | AUROC       | CI 95%        | p-value | AUROC      | CI 95%        | p-value |
| OPLONL_1.1 | 0.531       | 0.465 - 0.597 | 0.363   | 0.527      | 0.461 - 0.594 | 0.423   |
| OPLONL_1.2 | 0.525       | 0.459 - 0.592 | 0.455   | 0.523      | 0.457 - 0.59  | 0.494   |
| OPLONL_1.3 | 0.537       | 0.47 - 0.603  | 0.282   | 0.527      | 0.461 - 0.594 | 0.423   |
| OPLONL_1.4 | 0.555       | 0.489 - 0.621 | 0.104   | 0.55       | 0.484 - 0.616 | 0.146   |
| OPLONL_1.5 | 0.558       | 0.492 - 0.624 | 0.087   | 0.56       | 0.494 - 0.626 | 0.076   |
| OPLONL_1.6 | 0.557       | 0.491 - 0.623 | 0.094   | 0.566      | 0.5 - 0.632   | 0.052   |
| OPLONL_1.7 | 0.627       | 0.563 - 0.691 | < 0.001 | 0.622      | 0.559 - 0.686 | < 0.001 |
| OPLONL_1.8 | 0.601       | 0.537 - 0.666 | 0.003   | 0.6        | 0.535 - 0.665 | 0.003   |
| OPLONL_2.1 | 0.486       | 0.42 - 0.552  | 0.679   | 0.493      | 0.427 - 0.56  | 0.842   |
| OPLONL_2.2 | 0.51        | 0.443 - 0.576 | 0.776   | 0.507      | 0.44 - 0.573  | 0.841   |
| OPLONL_2.3 | 0.529       | 0.463 - 0.596 | 0.394   | 0.529      | 0.462 - 0.595 | 0.401   |
| OPLONL_2.4 | 0.55        | 0.483 - 0.616 | 0.144   | 0.546      | 0.479 - 0.612 | 0.181   |
| OPLONL_2.5 | 0.554       | 0.487 - 0.62  | 0.116   | 0.557      | 0.491 - 0.624 | 0.094   |
| OPLONL_2.6 | 0.529       | 0.462 - 0.595 | 0.399   | 0.529      | 0.463 - 0.596 | 0.388   |
| OPLONL_2.7 | 0.548       | 0.481 - 0.614 | 0.163   | 0.556      | 0.49 - 0.622  | 0.099   |
| OPLONL_2.8 | 0.611       | 0.547 - 0.676 | 0.001   | 0.605      | 0.54 - 0.669  | 0.002   |
| OPLONL_3.1 | 0.502       | 0.435 - 0.568 | 0.964   | 0.492      | 0.425 - 0.558 | 0.804   |
| OPLONL_3.2 | 0.528       | 0.462 - 0.595 | 0.409   | 0.533      | 0.467 - 0.6   | 0.328   |
| OPLONL_3.3 | 0.581       | 0.515 - 0.646 | 0.018   | 0.583      | 0.517 - 0.649 | 0.015   |
| OPLONL_3.4 | 0.612       | 0.548 - 0.677 | 0.001   | 0.609      | 0.544 - 0.674 | 0.001   |
| OPLONL_3.5 | 0.629       | 0.564 - 0.693 | < 0.001 | 0.628      | 0.564 - 0.693 | < 0.001 |
| OPLONL_3.6 | 0.583       | 0.518 - 0.649 | 0.014   | 0.586      | 0.52 - 0.652  | 0.011   |
| OPLONL_3.7 | 0.545       | 0.479 - 0.611 | 0.184   | 0.55       | 0.484 - 0.616 | 0.141   |
| OPLONL_3.8 | 0.536       | 0.47 - 0.602  | 0.287   | 0.558      | 0.493 - 0.624 | 0.086   |
| OPLONL_4.1 | 0.507       | 0.441 - 0.574 | 0.829   | 0.524      | 0.457 - 0.59  | 0.489   |
| OPLONL_4.2 | 0.573       | 0.507 - 0.639 | 0.033   | 0.566      | 0.5 - 0.632   | 0.052   |
| OPLONL_4.3 | 0.625       | 0.561 - 0.689 | < 0.001 | 0.615      | 0.55 - 0.679  | 0.001   |
| OPLONL_4.4 | 0.601       | 0.537 - 0.666 | 0.003   | 0.597      | 0.532 - 0.661 | 0.005   |
| OPLONL_4.5 | 0.567       | 0.501 - 0.632 | 0.05    | 0.572      | 0.506 - 0.637 | 0.035   |
| OPLONL_4.6 | 0.579       | 0.513 - 0.645 | 0.02    | 0.578      | 0.512 - 0.644 | 0.022   |
| OPLONL_4.7 | 0.515       | 0.449 - 0.582 | 0.655   | 0.521      | 0.454 - 0.587 | 0.541   |
| OPLONL_4.8 | 0.515       | 0.449 - 0.581 | 0.661   | 0.511      | 0.445 - 0.577 | 0.751   |
| OPLONL_5.1 | 0.52        | 0.453 - 0.587 | 0.559   | 0.51       | 0.444 - 0.577 | 0.764   |
| OPLONL_5.2 | 0.55        | 0.483 - 0.616 | 0.144   | 0.546      | 0.48 - 0.613  | 0.174   |
| OPLONL_5.3 | 0.589       | 0.523 - 0.654 | 0.009   | 0.586      | 0.52 - 0.651  | 0.012   |
| OPLONL_5.4 | 0.566       | 0.5 - 0.632   | 0.053   | 0.569      | 0.503 - 0.635 | 0.042   |

|            |       |               |       |       |               |       |
|------------|-------|---------------|-------|-------|---------------|-------|
| OPLONL_5.5 | 0.54  | 0.474 - 0.606 | 0.239 | 0.544 | 0.478 - 0.611 | 0.191 |
| OPLONL_5.6 | 0.571 | 0.505 - 0.636 | 0.038 | 0.58  | 0.514 - 0.645 | 0.019 |
| OPLONL_5.7 | 0.528 | 0.462 - 0.595 | 0.405 | 0.529 | 0.463 - 0.595 | 0.396 |
| OPLONL_5.8 | 0.501 | 0.434 - 0.568 | 0.975 | 0.5   | 0.433 - 0.566 | 0.99  |
| OPLONL_6.1 | 0.502 | 0.436 - 0.569 | 0.95  | 0.489 | 0.423 - 0.556 | 0.753 |
| OPLONL_6.2 | 0.514 | 0.447 - 0.581 | 0.682 | 0.505 | 0.438 - 0.572 | 0.886 |
| OPLONL_6.3 | 0.524 | 0.457 - 0.59  | 0.483 | 0.521 | 0.454 - 0.587 | 0.539 |
| OPLONL_6.4 | 0.56  | 0.494 - 0.626 | 0.079 | 0.556 | 0.49 - 0.622  | 0.1   |
| OPLONL_6.5 | 0.545 | 0.479 - 0.612 | 0.183 | 0.55  | 0.483 - 0.616 | 0.145 |
| OPLONL_6.6 | 0.537 | 0.47 - 0.603  | 0.281 | 0.531 | 0.464 - 0.597 | 0.365 |
| OPLONL_6.7 | 0.522 | 0.455 - 0.589 | 0.515 | 0.514 | 0.447 - 0.58  | 0.684 |
| OPLONL_6.8 | 0.53  | 0.463 - 0.596 | 0.384 | 0.502 | 0.436 - 0.569 | 0.946 |
| OPLONL_7.1 | 0.489 | 0.423 - 0.556 | 0.756 | 0.483 | 0.416 - 0.549 | 0.611 |
| OPLONL_7.2 | 0.479 | 0.413 - 0.546 | 0.542 | 0.482 | 0.416 - 0.549 | 0.605 |
| OPLONL_7.3 | 0.503 | 0.436 - 0.57  | 0.933 | 0.498 | 0.431 - 0.564 | 0.943 |
| OPLONL_7.4 | 0.497 | 0.43 - 0.564  | 0.927 | 0.501 | 0.434 - 0.568 | 0.978 |
| OPLONL_7.5 | 0.518 | 0.451 - 0.585 | 0.592 | 0.52  | 0.453 - 0.587 | 0.555 |
| OPLONL_7.6 | 0.525 | 0.459 - 0.592 | 0.454 | 0.526 | 0.46 - 0.593  | 0.437 |
| OPLONL_7.7 | 0.531 | 0.465 - 0.598 | 0.355 | 0.524 | 0.457 - 0.591 | 0.478 |
| OPLONL_7.8 | 0.563 | 0.497 - 0.629 | 0.065 | 0.573 | 0.507 - 0.639 | 0.031 |
| OPLONL_8.1 | 0.472 | 0.406 - 0.538 | 0.409 | 0.463 | 0.397 - 0.529 | 0.278 |
| OPLONL_8.2 | 0.464 | 0.398 - 0.531 | 0.295 | 0.481 | 0.414 - 0.547 | 0.569 |
| OPLONL_8.3 | 0.476 | 0.41 - 0.543  | 0.49  | 0.492 | 0.426 - 0.559 | 0.82  |
| OPLONL_8.4 | 0.49  | 0.423 - 0.557 | 0.769 | 0.495 | 0.429 - 0.562 | 0.895 |
| OPLONL_8.5 | 0.506 | 0.439 - 0.573 | 0.857 | 0.511 | 0.444 - 0.577 | 0.758 |
| OPLONL_8.6 | 0.519 | 0.452 - 0.586 | 0.583 | 0.533 | 0.467 - 0.6   | 0.329 |
| OPLONL_8.7 | 0.562 | 0.496 - 0.629 | 0.067 | 0.562 | 0.496 - 0.628 | 0.068 |
| OPLONL_8.8 | 0.557 | 0.49 - 0.623  | 0.096 | 0.569 | 0.503 - 0.635 | 0.043 |

**Table S7.** Area Under the Receiver Operating Characteristic Curve (AUROC) value, 95% Confidence Interval (CI) and p-value for each cell of the 8x8 macular grid of the inner retinal layers (INL) with the grid tilted at 7° and with the grid horizontalized.

|         | INCLINED 7° |               |         | HORIZONTAL |               |         |
|---------|-------------|---------------|---------|------------|---------------|---------|
|         | AUROC       | CI 95%        | p-value | AUROC      | CI 95%        | p-value |
| IRL_1.1 | 0.611       | 0.546 - 0.675 | 0.001   | 0.612      | 0.547 - 0.676 | 0.001   |
| IRL_1.2 | 0.644       | 0.582 - 0.707 | < 0.001 | 0.626      | 0.563 - 0.69  | < 0.001 |
| IRL_1.3 | 0.675       | 0.614 - 0.736 | < 0.001 | 0.678      | 0.617 - 0.739 | < 0.001 |
| IRL_1.4 | 0.684       | 0.624 - 0.745 | < 0.001 | 0.681      | 0.621 - 0.742 | < 0.001 |
| IRL_1.5 | 0.691       | 0.63 - 0.752  | < 0.001 | 0.688      | 0.627 - 0.748 | < 0.001 |
| IRL_1.6 | 0.718       | 0.66 - 0.776  | < 0.001 | 0.701      | 0.641 - 0.76  | < 0.001 |
| IRL_1.7 | 0.737       | 0.681 - 0.794 | < 0.001 | 0.732      | 0.675 - 0.789 | < 0.001 |
| IRL_1.8 | 0.726       | 0.668 - 0.783 | < 0.001 | 0.721      | 0.664 - 0.779 | < 0.001 |
| IRL_2.1 | 0.614       | 0.55 - 0.679  | 0.001   | 0.617      | 0.553 - 0.681 | 0.001   |
| IRL_2.2 | 0.661       | 0.599 - 0.723 | < 0.001 | 0.65       | 0.587 - 0.712 | < 0.001 |
| IRL_2.3 | 0.672       | 0.61 - 0.733  | < 0.001 | 0.672      | 0.61 - 0.733  | < 0.001 |
| IRL_2.4 | 0.662       | 0.6 - 0.724   | < 0.001 | 0.658      | 0.595 - 0.72  | < 0.001 |
| IRL_2.5 | 0.684       | 0.623 - 0.745 | < 0.001 | 0.675      | 0.613 - 0.736 | < 0.001 |
| IRL_2.6 | 0.693       | 0.633 - 0.753 | < 0.001 | 0.696      | 0.636 - 0.757 | < 0.001 |
| IRL_2.7 | 0.706       | 0.647 - 0.766 | < 0.001 | 0.716      | 0.658 - 0.775 | < 0.001 |
| IRL_2.8 | 0.769       | 0.715 - 0.822 | < 0.001 | 0.756      | 0.701 - 0.811 | < 0.001 |
| IRL_3.1 | 0.616       | 0.552 - 0.681 | 0.001   | 0.608      | 0.543 - 0.672 | 0.002   |
| IRL_3.2 | 0.645       | 0.582 - 0.708 | < 0.001 | 0.637      | 0.573 - 0.7   | < 0.001 |
| IRL_3.3 | 0.656       | 0.594 - 0.719 | < 0.001 | 0.651      | 0.589 - 0.714 | < 0.001 |
| IRL_3.4 | 0.675       | 0.613 - 0.736 | < 0.001 | 0.666      | 0.604 - 0.728 | < 0.001 |
| IRL_3.5 | 0.66        | 0.598 - 0.722 | < 0.001 | 0.667      | 0.605 - 0.729 | < 0.001 |
| IRL_3.6 | 0.641       | 0.578 - 0.704 | < 0.001 | 0.647      | 0.584 - 0.71  | < 0.001 |
| IRL_3.7 | 0.664       | 0.602 - 0.726 | < 0.001 | 0.666      | 0.605 - 0.728 | < 0.001 |
| IRL_3.8 | 0.691       | 0.631 - 0.751 | < 0.001 | 0.716      | 0.657 - 0.774 | < 0.001 |
| IRL_4.1 | 0.593       | 0.528 - 0.658 | 0.006   | 0.581      | 0.515 - 0.646 | 0.018   |
| IRL_4.2 | 0.627       | 0.564 - 0.691 | < 0.001 | 0.613      | 0.549 - 0.677 | 0.001   |
| IRL_4.3 | 0.629       | 0.566 - 0.693 | < 0.001 | 0.614      | 0.55 - 0.679  | 0.001   |
| IRL_4.4 | 0.552       | 0.486 - 0.618 | 0.124   | 0.546      | 0.48 - 0.612  | 0.174   |
| IRL_4.5 | 0.527       | 0.461 - 0.593 | 0.43    | 0.527      | 0.46 - 0.593  | 0.432   |
| IRL_4.6 | 0.571       | 0.505 - 0.636 | 0.038   | 0.574      | 0.508 - 0.639 | 0.03    |
| IRL_4.7 | 0.594       | 0.529 - 0.659 | 0.006   | 0.611      | 0.546 - 0.675 | 0.001   |
| IRL_4.8 | 0.607       | 0.543 - 0.672 | 0.002   | 0.637      | 0.573 - 0.7   | < 0.001 |
| IRL_5.1 | 0.563       | 0.497 - 0.629 | 0.066   | 0.568      | 0.502 - 0.633 | 0.047   |
| IRL_5.2 | 0.579       | 0.514 - 0.645 | 0.02    | 0.589      | 0.524 - 0.654 | 0.009   |
| IRL_5.3 | 0.593       | 0.528 - 0.658 | 0.006   | 0.597      | 0.532 - 0.662 | 0.004   |
| IRL_5.4 | 0.542       | 0.476 - 0.608 | 0.218   | 0.541      | 0.475 - 0.607 | 0.225   |

|         |       |               |         |       |               |         |
|---------|-------|---------------|---------|-------|---------------|---------|
| IRL_5.5 | 0.545 | 0.479 - 0.611 | 0.189   | 0.531 | 0.465 - 0.598 | 0.356   |
| IRL_5.6 | 0.567 | 0.501 - 0.632 | 0.05    | 0.56  | 0.494 - 0.626 | 0.079   |
| IRL_5.7 | 0.578 | 0.513 - 0.644 | 0.021   | 0.575 | 0.509 - 0.64  | 0.028   |
| IRL_5.8 | 0.603 | 0.538 - 0.667 | 0.003   | 0.59  | 0.525 - 0.655 | 0.008   |
| IRL 6.1 | 0.564 | 0.499 - 0.63  | 0.059   | 0.583 | 0.518 - 0.649 | 0.014   |
| IRL_6.2 | 0.606 | 0.542 - 0.67  | 0.002   | 0.607 | 0.542 - 0.671 | 0.002   |
| IRL_6.3 | 0.618 | 0.554 - 0.682 | 0.001   | 0.616 | 0.552 - 0.679 | 0.001   |
| IRL 6.4 | 0.616 | 0.552 - 0.68  | 0.001   | 0.617 | 0.553 - 0.681 | 0.001   |
| IRL_6.5 | 0.608 | 0.543 - 0.672 | 0.002   | 0.6   | 0.535 - 0.665 | 0.003   |
| IRL_6.6 | 0.616 | 0.552 - 0.68  | 0.001   | 0.603 | 0.538 - 0.667 | 0.003   |
| IRL_6.7 | 0.627 | 0.563 - 0.691 | < 0.001 | 0.606 | 0.542 - 0.671 | 0.002   |
| IRL 6.8 | 0.644 | 0.581 - 0.706 | < 0.001 | 0.634 | 0.571 - 0.698 | < 0.001 |
| IRL 7.1 | 0.576 | 0.511 - 0.642 | 0.025   | 0.59  | 0.525 - 0.655 | 0.008   |
| IRL_7.2 | 0.61  | 0.545 - 0.674 | 0.001   | 0.612 | 0.548 - 0.677 | 0.001   |
| IRL_7.3 | 0.627 | 0.563 - 0.69  | < 0.001 | 0.63  | 0.566 - 0.693 | < 0.001 |
| IRL 7.4 | 0.628 | 0.565 - 0.691 | < 0.001 | 0.63  | 0.567 - 0.694 | < 0.001 |
| IRL_7.5 | 0.636 | 0.573 - 0.699 | < 0.001 | 0.635 | 0.571 - 0.698 | < 0.001 |
| IRL 7.6 | 0.641 | 0.579 - 0.704 | < 0.001 | 0.638 | 0.575 - 0.701 | < 0.001 |
| IRL 7.7 | 0.668 | 0.606 - 0.729 | < 0.001 | 0.662 | 0.6 - 0.724   | < 0.001 |
| IRL_7.8 | 0.709 | 0.65 - 0.767  | < 0.001 | 0.685 | 0.625 - 0.745 | < 0.001 |
| IRL_8.1 | 0.596 | 0.531 - 0.66  | 0.005   | 0.604 | 0.54 - 0.669  | 0.002   |
| IRL_8.2 | 0.621 | 0.557 - 0.685 | < 0.001 | 0.63  | 0.567 - 0.694 | < 0.001 |
| IRL 8.3 | 0.649 | 0.586 - 0.711 | < 0.001 | 0.648 | 0.586 - 0.711 | < 0.001 |
| IRL 8.4 | 0.656 | 0.594 - 0.718 | < 0.001 | 0.662 | 0.6 - 0.724   | < 0.001 |
| IRL_8.5 | 0.672 | 0.611 - 0.733 | < 0.001 | 0.681 | 0.621 - 0.742 | < 0.001 |
| IRL_8.6 | 0.699 | 0.639 - 0.758 | < 0.001 | 0.698 | 0.639 - 0.757 | < 0.001 |
| IRL_8.7 | 0.71  | 0.651 - 0.768 | < 0.001 | 0.712 | 0.654 - 0.77  | < 0.001 |
| IRL 8.8 | 0.709 | 0.651 - 0.767 | < 0.001 | 0.72  | 0.662 - 0.778 | < 0.001 |

**Table S8.** Area Under the Receiver Operating Characteristic Curve (AUROC) value, 95% Confidence Interval (CI) and p-value for each cell of the 8x8 macular grid of the outer retinal layer (ORL) with the grid tilted at 7° and with the grid horizontalized.

|         | INCLINED 7° |               |         | HORIZONTAL |               |         |
|---------|-------------|---------------|---------|------------|---------------|---------|
|         | AUROC       | CI 95%        | p-value | AUROC      | CI 95%        | p-value |
| ORL_1.1 | 0.555       | 0.488 - 0.621 | 0.109   | 0.539      | 0.473 - 0.606 | 0.251   |
| ORL_1.2 | 0.572       | 0.507 - 0.638 | 0.034   | 0.558      | 0.492 - 0.625 | 0.086   |
| ORL_1.3 | 0.561       | 0.495 - 0.628 | 0.071   | 0.539      | 0.473 - 0.606 | 0.248   |
| ORL_1.4 | 0.572       | 0.506 - 0.638 | 0.036   | 0.568      | 0.502 - 0.635 | 0.045   |
| ORL_1.5 | 0.555       | 0.489 - 0.622 | 0.104   | 0.568      | 0.502 - 0.634 | 0.047   |
| ORL_1.6 | 0.587       | 0.521 - 0.652 | 0.011   | 0.585      | 0.52 - 0.651  | 0.012   |
| ORL_1.7 | 0.586       | 0.52 - 0.651  | 0.012   | 0.587      | 0.522 - 0.653 | 0.01    |
| ORL_1.8 | 0.545       | 0.479 - 0.611 | 0.183   | 0.581      | 0.516 - 0.646 | 0.018   |
| ORL_2.1 | 0.535       | 0.468 - 0.601 | 0.31    | 0.534      | 0.468 - 0.6   | 0.318   |
| ORL_2.2 | 0.543       | 0.477 - 0.609 | 0.21    | 0.534      | 0.468 - 0.6   | 0.317   |
| ORL_2.3 | 0.533       | 0.467 - 0.599 | 0.333   | 0.519      | 0.452 - 0.585 | 0.585   |
| ORL_2.4 | 0.527       | 0.461 - 0.593 | 0.428   | 0.523      | 0.457 - 0.59  | 0.495   |
| ORL_2.5 | 0.552       | 0.486 - 0.618 | 0.125   | 0.55       | 0.484 - 0.616 | 0.14    |
| ORL_2.6 | 0.57        | 0.504 - 0.635 | 0.041   | 0.565      | 0.499 - 0.63  | 0.058   |
| ORL_2.7 | 0.579       | 0.514 - 0.645 | 0.02    | 0.604      | 0.539 - 0.668 | 0.002   |
| ORL_2.8 | 0.56        | 0.495 - 0.626 | 0.076   | 0.57       | 0.504 - 0.636 | 0.039   |
| ORL_3.1 | 0.543       | 0.477 - 0.61  | 0.202   | 0.548      | 0.482 - 0.614 | 0.16    |
| ORL_3.2 | 0.529       | 0.463 - 0.596 | 0.391   | 0.526      | 0.459 - 0.592 | 0.448   |
| ORL_3.3 | 0.517       | 0.451 - 0.584 | 0.611   | 0.51       | 0.443 - 0.576 | 0.78    |
| ORL_3.4 | 0.508       | 0.442 - 0.574 | 0.814   | 0.51       | 0.443 - 0.576 | 0.774   |
| ORL_3.5 | 0.539       | 0.472 - 0.605 | 0.258   | 0.522      | 0.455 - 0.588 | 0.526   |
| ORL_3.6 | 0.542       | 0.476 - 0.608 | 0.221   | 0.54       | 0.474 - 0.606 | 0.237   |
| ORL_3.7 | 0.536       | 0.469 - 0.602 | 0.293   | 0.567      | 0.501 - 0.632 | 0.051   |
| ORL_3.8 | 0.519       | 0.453 - 0.586 | 0.575   | 0.566      | 0.5 - 0.631   | 0.054   |
| ORL_4.1 | 0.546       | 0.48 - 0.613  | 0.173   | 0.541      | 0.475 - 0.608 | 0.224   |
| ORL_4.2 | 0.514       | 0.447 - 0.58  | 0.691   | 0.506      | 0.44 - 0.572  | 0.856   |
| ORL_4.3 | 0.478       | 0.411 - 0.544 | 0.509   | 0.479      | 0.413 - 0.546 | 0.543   |
| ORL_4.4 | 0.439       | 0.373 - 0.504 | 0.071   | 0.442      | 0.377 - 0.508 | 0.091   |
| ORL_4.5 | 0.442       | 0.376 - 0.508 | 0.086   | 0.45       | 0.384 - 0.516 | 0.141   |
| ORL_4.6 | 0.487       | 0.421 - 0.554 | 0.708   | 0.507      | 0.44 - 0.574  | 0.836   |
| ORL_4.7 | 0.494       | 0.428 - 0.561 | 0.867   | 0.517      | 0.45 - 0.583  | 0.625   |
| ORL_4.8 | 0.516       | 0.45 - 0.583  | 0.633   | 0.515      | 0.448 - 0.582 | 0.657   |
| ORL_5.1 | 0.54        | 0.474 - 0.607 | 0.235   | 0.533      | 0.467 - 0.599 | 0.333   |
| ORL_5.2 | 0.52        | 0.454 - 0.587 | 0.553   | 0.517      | 0.451 - 0.583 | 0.616   |
| ORL_5.3 | 0.49        | 0.423 - 0.556 | 0.76    | 0.488      | 0.422 - 0.555 | 0.734   |
| ORL_5.4 | 0.453       | 0.387 - 0.519 | 0.17    | 0.454      | 0.388 - 0.52  | 0.173   |

|         |       |               |       |       |               |       |
|---------|-------|---------------|-------|-------|---------------|-------|
| ORL_5.5 | 0.44  | 0.375 - 0.506 | 0.08  | 0.44  | 0.374 - 0.506 | 0.077 |
| ORL_5.6 | 0.469 | 0.403 - 0.536 | 0.366 | 0.456 | 0.389 - 0.522 | 0.191 |
| ORL_5.7 | 0.498 | 0.431 - 0.564 | 0.943 | 0.501 | 0.435 - 0.568 | 0.967 |
| ORL_5.8 | 0.492 | 0.425 - 0.559 | 0.813 | 0.515 | 0.448 - 0.583 | 0.65  |
| ORL_6.1 | 0.525 | 0.459 - 0.591 | 0.463 | 0.506 | 0.439 - 0.572 | 0.861 |
| ORL_6.2 | 0.493 | 0.427 - 0.56  | 0.844 | 0.482 | 0.416 - 0.548 | 0.597 |
| ORL_6.3 | 0.503 | 0.436 - 0.569 | 0.938 | 0.502 | 0.435 - 0.568 | 0.959 |
| ORL_6.4 | 0.503 | 0.437 - 0.569 | 0.93  | 0.508 | 0.442 - 0.575 | 0.804 |
| ORL_6.5 | 0.514 | 0.447 - 0.58  | 0.686 | 0.511 | 0.445 - 0.578 | 0.744 |
| ORL_6.6 | 0.532 | 0.466 - 0.598 | 0.35  | 0.521 | 0.455 - 0.588 | 0.532 |
| ORL_6.7 | 0.493 | 0.426 - 0.56  | 0.832 | 0.494 | 0.427 - 0.561 | 0.858 |
| ORL_6.8 | 0.526 | 0.459 - 0.592 | 0.453 | 0.5   | 0.433 - 0.567 | 0.991 |
| ORL_7.1 | 0.496 | 0.429 - 0.563 | 0.905 | 0.51  | 0.444 - 0.577 | 0.762 |
| ORL_7.2 | 0.514 | 0.447 - 0.58  | 0.692 | 0.516 | 0.449 - 0.582 | 0.644 |
| ORL_7.3 | 0.515 | 0.448 - 0.581 | 0.666 | 0.518 | 0.452 - 0.585 | 0.594 |
| ORL_7.4 | 0.509 | 0.442 - 0.575 | 0.798 | 0.505 | 0.438 - 0.571 | 0.894 |
| ORL_7.5 | 0.508 | 0.442 - 0.575 | 0.812 | 0.508 | 0.442 - 0.575 | 0.808 |
| ORL_7.6 | 0.549 | 0.483 - 0.615 | 0.148 | 0.53  | 0.463 - 0.596 | 0.384 |
| ORL_7.7 | 0.524 | 0.457 - 0.59  | 0.483 | 0.522 | 0.456 - 0.589 | 0.512 |
| ORL_7.8 | 0.523 | 0.457 - 0.59  | 0.497 | 0.538 | 0.472 - 0.604 | 0.264 |
| ORL_8.1 | 0.502 | 0.435 - 0.569 | 0.952 | 0.503 | 0.437 - 0.57  | 0.926 |
| ORL_8.2 | 0.495 | 0.428 - 0.561 | 0.879 | 0.497 | 0.43 - 0.563  | 0.919 |
| ORL_8.3 | 0.484 | 0.418 - 0.551 | 0.643 | 0.473 | 0.407 - 0.539 | 0.428 |
| ORL_8.4 | 0.502 | 0.435 - 0.568 | 0.955 | 0.507 | 0.44 - 0.573  | 0.845 |
| ORL_8.5 | 0.516 | 0.449 - 0.582 | 0.644 | 0.541 | 0.475 - 0.607 | 0.227 |
| ORL_8.6 | 0.551 | 0.485 - 0.616 | 0.137 | 0.544 | 0.478 - 0.61  | 0.198 |
| ORL_8.7 | 0.532 | 0.466 - 0.598 | 0.345 | 0.559 | 0.493 - 0.625 | 0.083 |
| ORL_8.8 | 0.543 | 0.477 - 0.609 | 0.207 | 0.563 | 0.497 - 0.629 | 0.065 |



**Table S9.** AUROC and comparison of mean and weighted indices for the 8x8 grid of the Posterior Pole (PP) using Spectralis SD-OCT in the thickness of the complete retina.

| Complete retina          | AUROC   | CI 95%        | p-value |
|--------------------------|---------|---------------|---------|
| <b>Horizontilized</b>    |         |               |         |
| Mean index               | 0.7432  | 0.688 - 0.798 | < 0.001 |
| Weighted index           | 0.7409  | 0.686 - 0.796 | < 0.001 |
| <i>Mean vs. Weighted</i> | 0.0023  | -0.01 - 0.015 | 0.712   |
| <b>Inclined</b>          |         |               |         |
| Mean index               | 0.7518  | 0.698 - 0.806 | < 0.001 |
| Weighted index           | 0.7523  | 0.698 - 0.806 | < 0.001 |
| <i>Mean vs. Weighted</i> | -0.0005 | -0.001 - 0    | 0.223   |

**Table S10.** AUROC and comparison of mean and weighted indices for the 8x8 grid of the Posterior Pole (PP) using Spectralis SD-OCT in the thickness of the RNFL..

| RNFL                     | AUROC   | CI 95%         | p-value |
|--------------------------|---------|----------------|---------|
| <b>Horizontilized</b>    |         |                |         |
| Mean index               | 0.7937  | 0.744 - 0.843  | < 0.001 |
| Weighted index           | 0.7941  | 0.744 - 0.844  | < 0.001 |
| <i>Mean vs. Weighted</i> | -0.0004 | -0.002 - 0.001 | 0.489   |
| <b>Inclined</b>          |         |                |         |
| Mean index               | 0.7959  | 0.746 - 0.845  | < 0.001 |
| Weighted index           | 0.7961  | 0.747 - 0.846  | < 0.001 |
| <i>Mean vs. Weighted</i> | -0.0002 | -0.001 - 0     | 0.443   |

**Table S2.** AUROC and comparison of mean and weighted indices for the 8x8 grid of the Posterior Pole (PP) using Spectralis SD-OCT in the thickness of the GCL.

| GCL                      | AUROC   | CI 95%         | p-value |
|--------------------------|---------|----------------|---------|
| <b>Horizontilized</b>    |         |                |         |
| Mean index               | 0.7813  | 0.729 - 0.834  | < 0.001 |
| Weighted index           | 0.7814  | 0.729 - 0.834  | < 0.001 |
| <i>Mean vs. Weighted</i> | -0.0001 | -0.001 - 0.001 | 0.612   |
| <b>Inclined</b>          |         |                |         |
| Mean index               | 0.7841  | 0.732 - 0.836  | < 0.001 |
| Weighted index           | 0.784   | 0.732 - 0.836  | < 0.001 |
| <i>Mean vs. Weighted</i> | 0.0001  | -0.001 - 0.001 | 0.799   |

**Table S12.** AUROC and comparison of mean and weighted indices for the 8x8 grid of the Posterior Pole (PP) using Spectralis SD-OCT in the thickness of the ganglion cell complex.

| Ganglion cell complex    | AUROC   | CI 95%         | p-value |
|--------------------------|---------|----------------|---------|
| <b>Horizontilized</b>    |         |                |         |
| Mean index               | 0.7842  | 0.733 - 0.835  | < 0.001 |
| Weighted index           | 0.7844  | 0.734 - 0.835  | < 0.001 |
| <i>Mean vs. Weighted</i> | -0.0002 | -0.001 - 0.001 | 0.701   |
| <b>Inclined</b>          |         |                |         |
| Mean index               | 0.7846  | 0.734 - 0.835  | < 0.001 |
| Weighted index           | 0.785   | 0.734 - 0.836  | < 0.001 |
| <i>Mean vs. Weighted</i> | -0.0004 | -0.001 - 0     | 0.266   |

**Table S13.** AUROC and comparison of mean and weighted indices for the 8x8 grid of the Posterior Pole (PP) using Spectralis SD-OCT in the thickness of GCL IPL.

| GCL IPL                  | AUROC   | CI 95%        | <i>p</i> -value |
|--------------------------|---------|---------------|-----------------|
| <b>Horizontilized</b>    |         |               |                 |
| Mean index               | 0.7687  | 0.715 - 0.823 | < 0.001         |
| Weighted index           | 0.769   | 0.715 - 0.823 | < 0.001         |
| <i>Mean vs. Weighted</i> | -0.0003 | -0.001 - 0    | 0.354           |
| <b>Inclined</b>          |         |               |                 |
| Mean index               | 0.7701  | 0.717 - 0.824 | < 0.001         |
| Weighted index           | 0.7703  | 0.717 - 0.824 | < 0.001         |
| <i>Mean vs. Weighted</i> | -0.0002 | -0.001 - 0    | 0.403           |

**Table S14.** AUROC and comparison of mean and weighted indices for the 8x8 grid of the Posterior Pole (PP) using Spectralis SD-OCT in the thickness of the IRL.

| IRL                      | AUROC   | CI 95%        | <i>p</i> -value |
|--------------------------|---------|---------------|-----------------|
| <b>Horizontilized</b>    |         |               |                 |
| Mean index               | 0.7513  | 0.697 - 0.806 | < 0.001         |
| Weighted index           | 0.7505  | 0.696 - 0.805 | < 0.001         |
| <i>Mean vs. Weighted</i> | 0.0008  | -0.008 - 0.01 | 0.861           |
| <b>Inclined</b>          |         |               |                 |
| Mean index               | 0.7551  | 0.701 - 0.809 | < 0.001         |
| Weighted index           | 0.7555  | 0.702 - 0.809 | < 0.001         |
| <i>Mean vs. Weighted</i> | -0.0004 | -0.001 - 0    | 0.287           |
